# Supplementary material
Source: HighWire-hosted journal article supplement (https://www.annfammed.org/content/suppl/2010/06/07/8.Suppl_1.S9)
Supplement: Jaen_SuppApp8.pdf [file Jaen_SuppApp8.pdf]

[http://www.annfammed.org/cgi/content/full/8/Suppl\\_1/S9/DC1](http://www.annfammed.org/cgi/content/full/8/Suppl_1/S9/DC1)

---
